# Supplementary material for: A facile template method to fabricate one-dimensional Fe3O4@SiO2@C/Ni microtubes with efficient catalytic and adsorption performance
Source: Royal Society of Chemistry journal article supplement (doi:10.1039/d1ce01104a), 2021-01-01
Supplement: d1ce01104a1.pdf [file d1ce01104a1.pdf]

# A facile template method to fabricate one-dimensional $\text{Fe}_3\text{O}_4@\text{SiO}_2@\text{C}/\text{Ni}$ microtubes with efficient catalytic and adsorption performance

Liting Yang<sup>a</sup>, Jing Zheng<sup>a</sup>, Jingli Xu<sup>a</sup>, Baishun Zhang<sup>b\*</sup>, Min Zhang<sup>a\*</sup>

<sup>a</sup> College of Chemistry and Chemical Engineering, Shanghai University of Engineering Science, Shanghai 201620, PR China. E-mail: zhangmin@sues.edu.cn.

<sup>b</sup> Anhui Institute of Public Security Education, 559 Wangjiang West Road, Hefei, Anhui 230088, PR China. E-mail: zbs01@163.com.

## Supporting Information

### Preparation of $\text{Fe}_3\text{O}_4@\text{SiO}_2@\text{C}/\text{Ni}$ (700 °C)

The synthesis of  $\text{Fe}_3\text{O}_4@\text{SiO}_2@\text{C}/\text{Ni}$  (700 °C) was similar with that of  $\text{Fe}_3\text{O}_4@\text{SiO}_2@\text{C}/\text{Ni}$  (500 °C) just changing the carbonization temperature from 500 °C to 700 °C.

### Preparation of $\text{Fe}_3\text{O}_4@\text{C}/\text{Ni}$ and $\text{Fe}_3\text{O}_4@\text{SiO}_2@\text{C}/\text{Ni}$ (200 $\mu\text{L}$ )

$\text{Fe}_3\text{O}_4@\text{C}/\text{Ni}$  and  $\text{Fe}_3\text{O}_4@\text{SiO}_2@\text{C}/\text{Ni}$  (200  $\mu\text{L}$ ) were prepared through annealing their precursor ( $\text{FeOOH}@\text{PDA}-\text{Ni}^{2+}$  and  $\text{FeOOH}@\text{SiO}_2@\text{PDA}-\text{Ni}^{2+}$  (200  $\mu\text{L}$ )) at 500°C for 5 h in the protection of  $\text{N}_2$  gas. The synthesis of  $\text{FeOOH}@\text{PDA}-\text{Ni}^{2+}$  and  $\text{FeOOH}@\text{SiO}_2@\text{PDA}-\text{Ni}^{2+}$  (200  $\mu\text{L}$ ) was similar with that of  $\text{FeOOH}@\text{SiO}_2@\text{PDA}-\text{Ni}^{2+}$  (50  $\mu\text{L}$ ) just changing the amount of TEOS from 50  $\mu\text{L}$  to 0  $\mu\text{L}$  and 200  $\mu\text{L}$ .

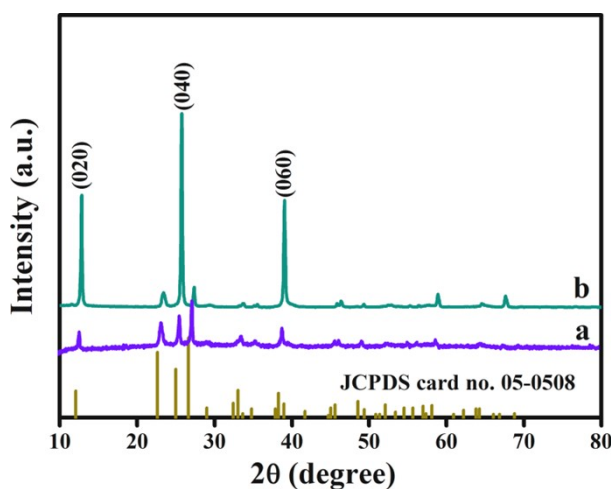

Figure S1. XRD patterns of the as-prepared MoO<sub>3</sub> (b) and MoO<sub>3</sub>@FeOOH (a)

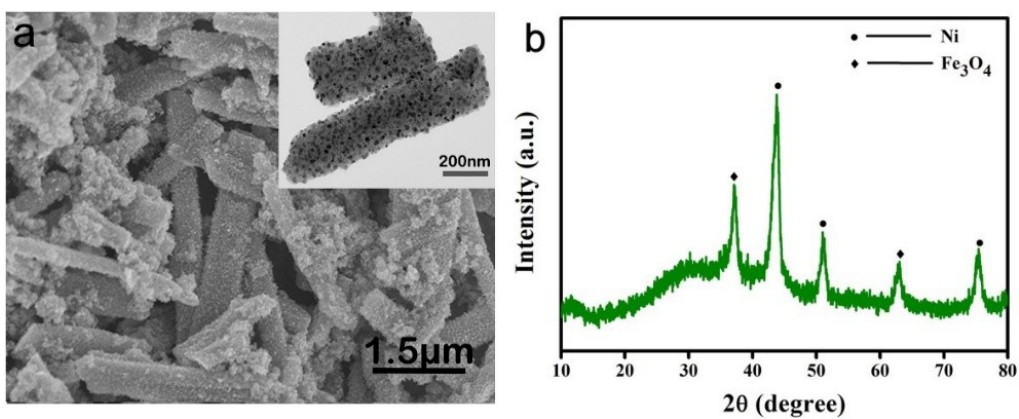

Figure S2. SEM and TEM image (a), XRD pattern of the  $\text{Fe}_3\text{O}_4@\text{SiO}_2@\text{C}/\text{Ni}$ -700 (b)

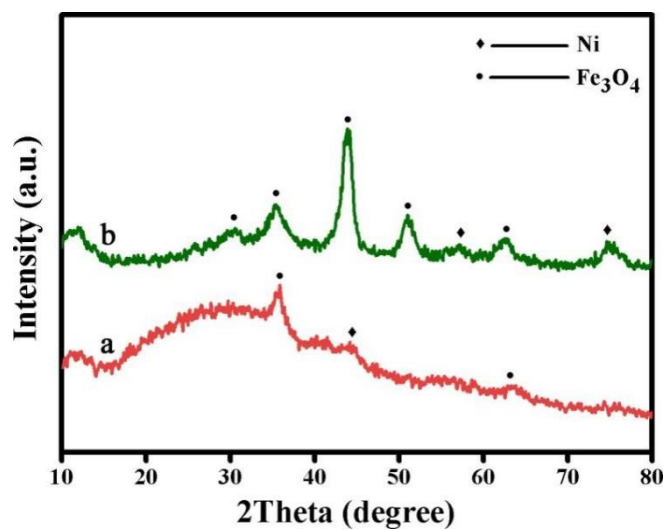

Figure S3. XRD pattern: (a)  $\text{Fe}_3\text{O}_4@\text{SiO}_2@\text{C}/\text{Ni}$  microtubes (200uL TEOS); (b)  $\text{Fe}_3\text{O}_4@\text{C}/\text{Ni}$  microtubes

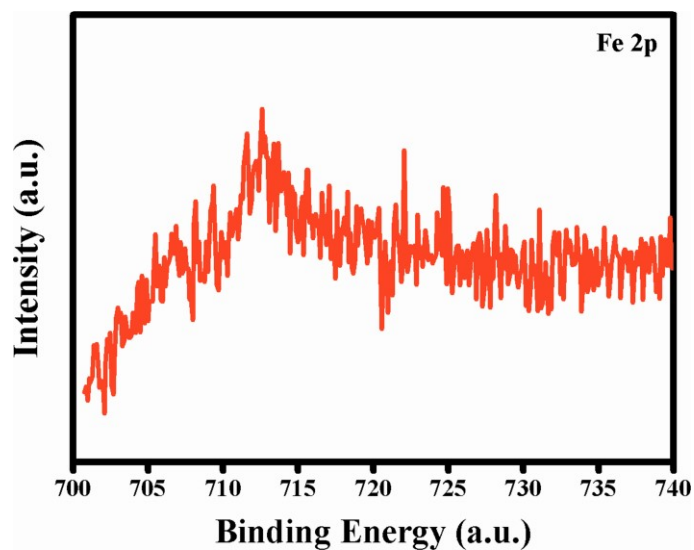

Figure S4. High-resolution of Fe 2p

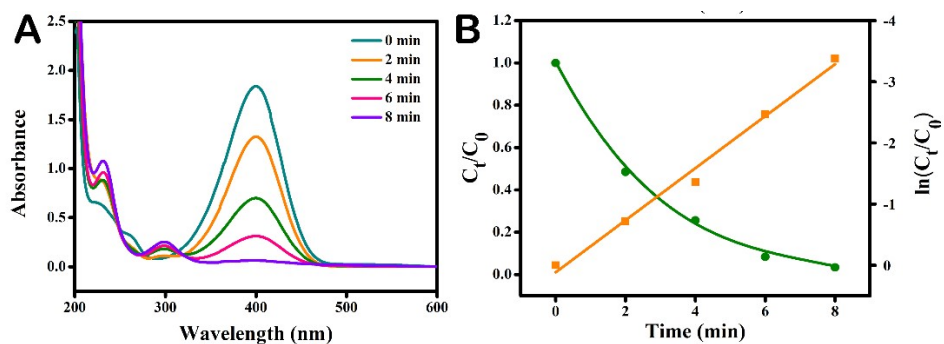

**Figure S5.** (A): successive reduction of 4-NP using  $\text{Fe}_3\text{O}_4@\text{C}/\text{Ni}$  as catalyst; (B):  $C_t/C_0$  and  $\ln(C_t/C_0)$  versus reaction time for the reduction of 4-NP over  $\text{Fe}_3\text{O}_4@\text{C}/\text{Ni}$ .

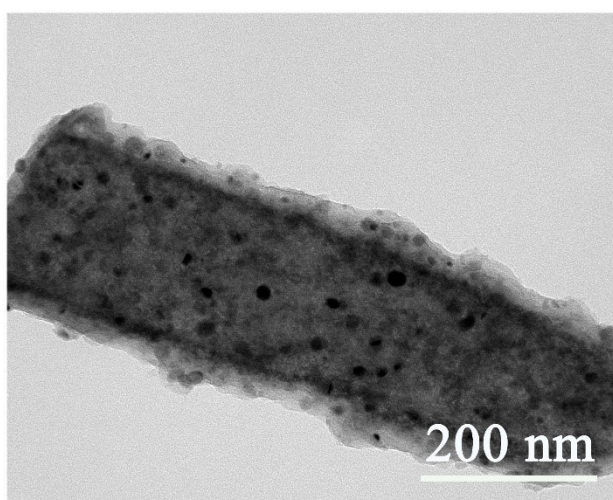

**Figure S6.** TEM image of  $\text{Fe}_3\text{O}_4@\text{SiO}_2@\text{C}/\text{Ni}$  after five cycle

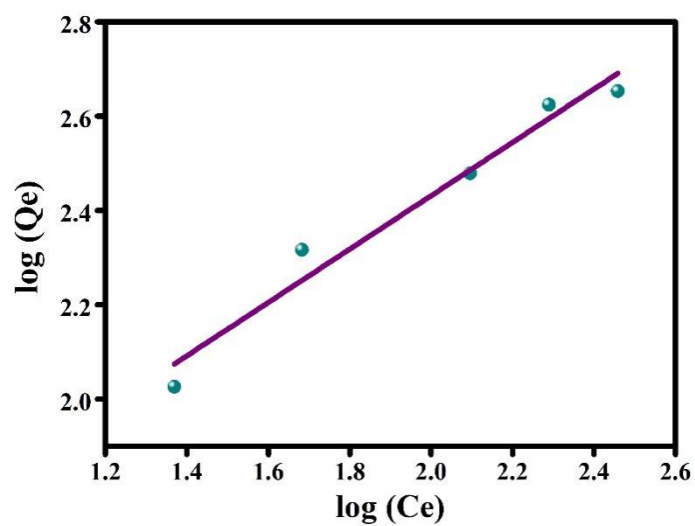

**Figure S7.** Linear fitting of adsorption isotherms plots based on Freundlich model
